# Supplementary material for: A Strong B-cell Response Is Part of the Immune Landscape in Human High-Grade Serous Ovarian Metastases
Source: Oxford University Press journal article supplement (doi:10.1158/1078-0432.ccr-16-0081), 2016-06-29
Supplement: 10780432ccr160081-sup-160694_1_supp_3493426_r7rmn3.xlsx [file 10780432ccr160081-sup-160694_1_supp_3493426_r7rmn3.xlsx]

## Sheet: Sheet1
Supplementary Table S1. Total patient cohort
Characteristics	Number	Percentage
Age
Mean	62	n/a
Range	39-79	n/a
Stage
FIGO I/II	6	6.5
FIGO III	69	75
FIGO IV	17	18.5
Chemotherapy*
Carboplatin	6	6.5
Taxol	1	1.1
Carboplatin+Taxol**	54	58.7
Unknown	6	6.5
n/a	25	27.2
All patients were diagnosed with HGSOC.
* 3 of the chemotherapy treated patients also received bevacizumab, AVASTIN
** 7 of the patients were enrolled in the ICON8 trial
