# Supplementary material for: A Strong B-cell Response Is Part of the Immune Landscape in Human High-Grade Serous Ovarian Metastases
Source: Oxford University Press journal article supplement (doi:10.1158/1078-0432.ccr-16-0081), 2016-06-29
Supplement: 10780432ccr160081-sup-160694_1_supp_3493430_w7wmn4.xlsx [file 10780432ccr160081-sup-160694_1_supp_3493430_w7wmn4.xlsx]

## Sheet: Sheet1
Supplementary table S5
	Patient	Age	Disease	Stage	NACT	NACT cycles
Pre Chemotherapy	G76	64	HGSC	3C	na	na
	G82	39	HGSC	3C	na	na
	G123	59	HGSC	3C	na	na
	G124	63	HGSC	3C	na	na
	G138	68	HGSC	3C	na	na
Post chemotherapy sub-optimal response	G73	67	HGSC	3C	Carbo*	4
	G75	47	HGSC	3C	Carbo/Taxol	4
	G120	68	HGSC	3C	Carbo	4
	G121	61	HGSC	4	Carbo/Taxol	4
	G128	66	HGSC	3C	Carbo/Taxol	6
	G133	65	HGSC	3C	Carbo/Taxol	3
	G139	68	HGSC	4	Carbo/Taxol	3
Post chemotherapy optimal response	G81	40	HGSC	3C	Carbo/Taxol	3
	G92	39	HGSC	3C	Carbo	3
	G127	56	HGSC	4	Carbo/Taxol	3
	G132	66	HGSC	4	Carbo/Taxol	3
Control plasma	ctrl7	61	na	na	na	na
	ctrl2	54	na	na	na	na
* this patient also received Bevacizumab (Avastin)
