# Supplementary material for: A Strong B-cell Response Is Part of the Immune Landscape in Human High-Grade Serous Ovarian Metastases
Source: Oxford University Press journal article supplement (doi:10.1158/1078-0432.ccr-16-0081), 2016-06-29
Supplement: 10780432ccr160081-sup-160694_1_supp_3493448_c7cmn3.xlsx [file 10780432ccr160081-sup-160694_1_supp_3493448_c7cmn3.xlsx]

## Sheet: Sheet1
Supplementary table S4
		H&E	Age	Disease	Stage	Chemotherapy
Pre-chemotherapy	G30		73	HGSOC	3B	na
	G54		52	HGSOC	3C	na
	G69		72	HGSOC	3C	na
	G82		39	HGSOC	3C	na
	G123		53	HGSOC	3C	na
	G124		63	HGSOC	3	na
Post-chemotherapy with residual disease	G11		50	HGSOC	3C	Carboplatin
	G61		61	HGSOC	3C	Carboplatin/Taxol
	G77		66	HGSOC	3C	Carboplatin
	G79		76	HGSOC	3C	carboplatin
	G100		69	HGSOC	4	Carboplatin/Taxol
	G101		49	HGSOC	3C	Carboplatin/Taxol
	G120		69	HGSOC	3	Carboplatin
	G128		66	HGSOC	3	Carboplatin/Taxol
Post-chemotherapy with low/no residual disease	G8		58	HGSOC	3C	Carboplatin/Taxol
	G12		69	HGSOC	3C	Carboplatin/Taxol
	G29		52	HGSOC	4	Carboplatin/Taxol
	G81		40	HGSOC	3C	Carboplatin
	G85		71	HGSOC	3C	unknown
	G92		39	HGSOC	3C	Carboplatin
	G96		35	HGSOC	3C	Carboplatin/Taxol
	G102		53	HGSOC	3C	Carboplatin/Taxol
Non involved Omentum	G35		72	HGSOC	1A	na
	G42		50	HGSOC	1A	na
