# Supplementary material for: A Strong B-cell Response Is Part of the Immune Landscape in Human High-Grade Serous Ovarian Metastases
Source: Oxford University Press journal article supplement (doi:10.1158/1078-0432.ccr-16-0081), 2016-06-29
Supplement: 10780432ccr160081-sup-160694_1_supp_3506500_c7cmn4.xlsx [file 10780432ccr160081-sup-160694_1_supp_3506500_c7cmn4.xlsx]

## Sheet: Sheet1
Supplementary Table S6
Primer	Primer Sequence (5’ -> 3’)
v4N_V1	TCGTCGGCAGCGTCAGATGTGTATAAGAGACAGNNNNNNNNNCAGTCTGGGTGCGACAGGCCCCTGGACAA
v4N_V2	TCGTCGGCAGCGTCAGATGTGTATAAGAGACAGNNNNNNNNNCAGTTGGATCCGTCAGCCCCCAGGGAAGG
v4N_V3	TCGTCGGCAGCGTCAGATGTGTATAAGAGACAGNNNNNNNNNCAGTGGTCCGCCAGGCTCCAGGGAA
v4N_V4	TCGTCGGCAGCGTCAGATGTGTATAAGAGACAGNNNNNNNNNCAGTTGGATCCGCCAGCCCCCAGGGAAGG
v4N_V5	TCGTCGGCAGCGTCAGATGTGTATAAGAGACAGNNNNNNNNNCAGTGGGTGCGCCAGATGCCCGGGAAAGG
v4N_V6	TCGTCGGCAGCGTCAGATGTGTATAAGAGACAGNNNNNNNNNCAGTTGGATCAGGCAGTCCCCATCGAGAG
v4N_V7	TCGTCGGCAGCGTCAGATGTGTATAAGAGACAGNNNNNNNNNCAGTTTGGGTGCGACAGGCCCCTGGACAA
v4N_JH	GTCTCGTGGGCTCGGAGATGTGTATAAGAGACAGNNNNCTTACCTGAGGAGACGGTGACC
iF_N501	AATGATACGGCGACCACCGAGATCTACACTAGATCGCTCGTCGGCAGCGTC
iF_N502	AATGATACGGCGACCACCGAGATCTACACCTCTCTATCTCGTCGGCAGCGTC
iF_N503	AATGATACGGCGACCACCGAGATCTACACTATCCTCTCTCGTCGGCAGCGTC
iF_N504	AATGATACGGCGACCACCGAGATCTACACAGAGTAGACTCGTCGGCAGCGTC
iR_N701	CAAGCAGAAGACGGCATACGAGATTCGCCTTAGTCTCGTGGGCTCGG
iR_N702	CAAGCAGAAGACGGCATACGAGATCTAGTACGGTCTCGTGGGCTCGG
iR_N703	CAAGCAGAAGACGGCATACGAGATTTCTGCCTGTCTCGTGGGCTCGG
iR_N704	CAAGCAGAAGACGGCATACGAGATGCTCAGGAGTCTCGTGGGCTCGG
‘N’ represents a randomly synthesized nucleotide.
